# Supplementary material
Source: PubMed Central journal article supplement (PMC11449391)
Supplement: mbc-35-ar121-s001.pdf [file mbc-35-ar121-s001.pdf]

# Supplemental Materials

*Molecular Biology of the Cell*

Haase *et al.*

**A**

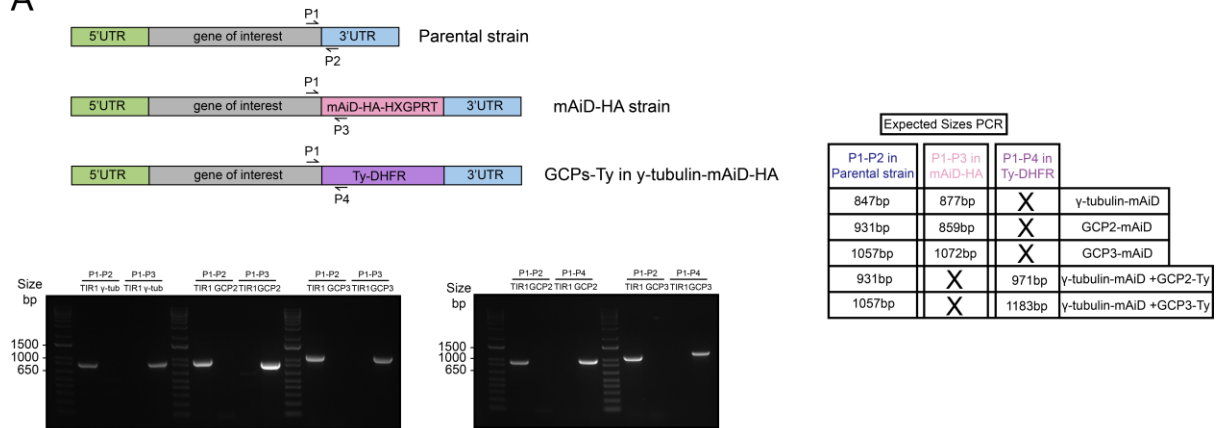

**B**

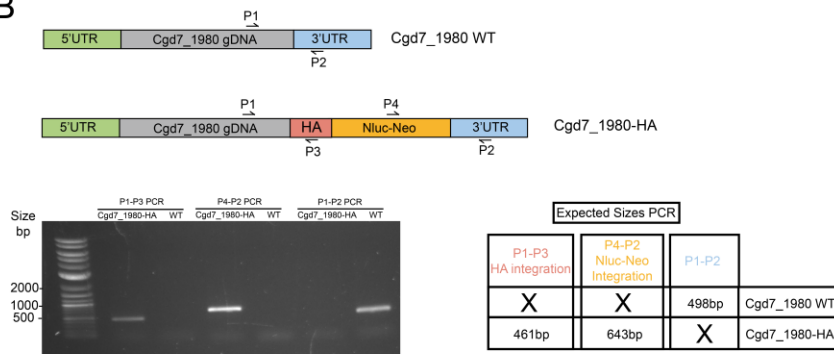

**Supplemental Figure 1**

**(A):** Schematic representation of the genomic construction for *T. gondii* strains used in this study. Verification by genomic PCR of the correct integration of the constructs. **(B):** Schematic representation of the genomic construction for *C. parvum* strains used in this study. Verification by genomic PCR of the correct integration of the constructs.

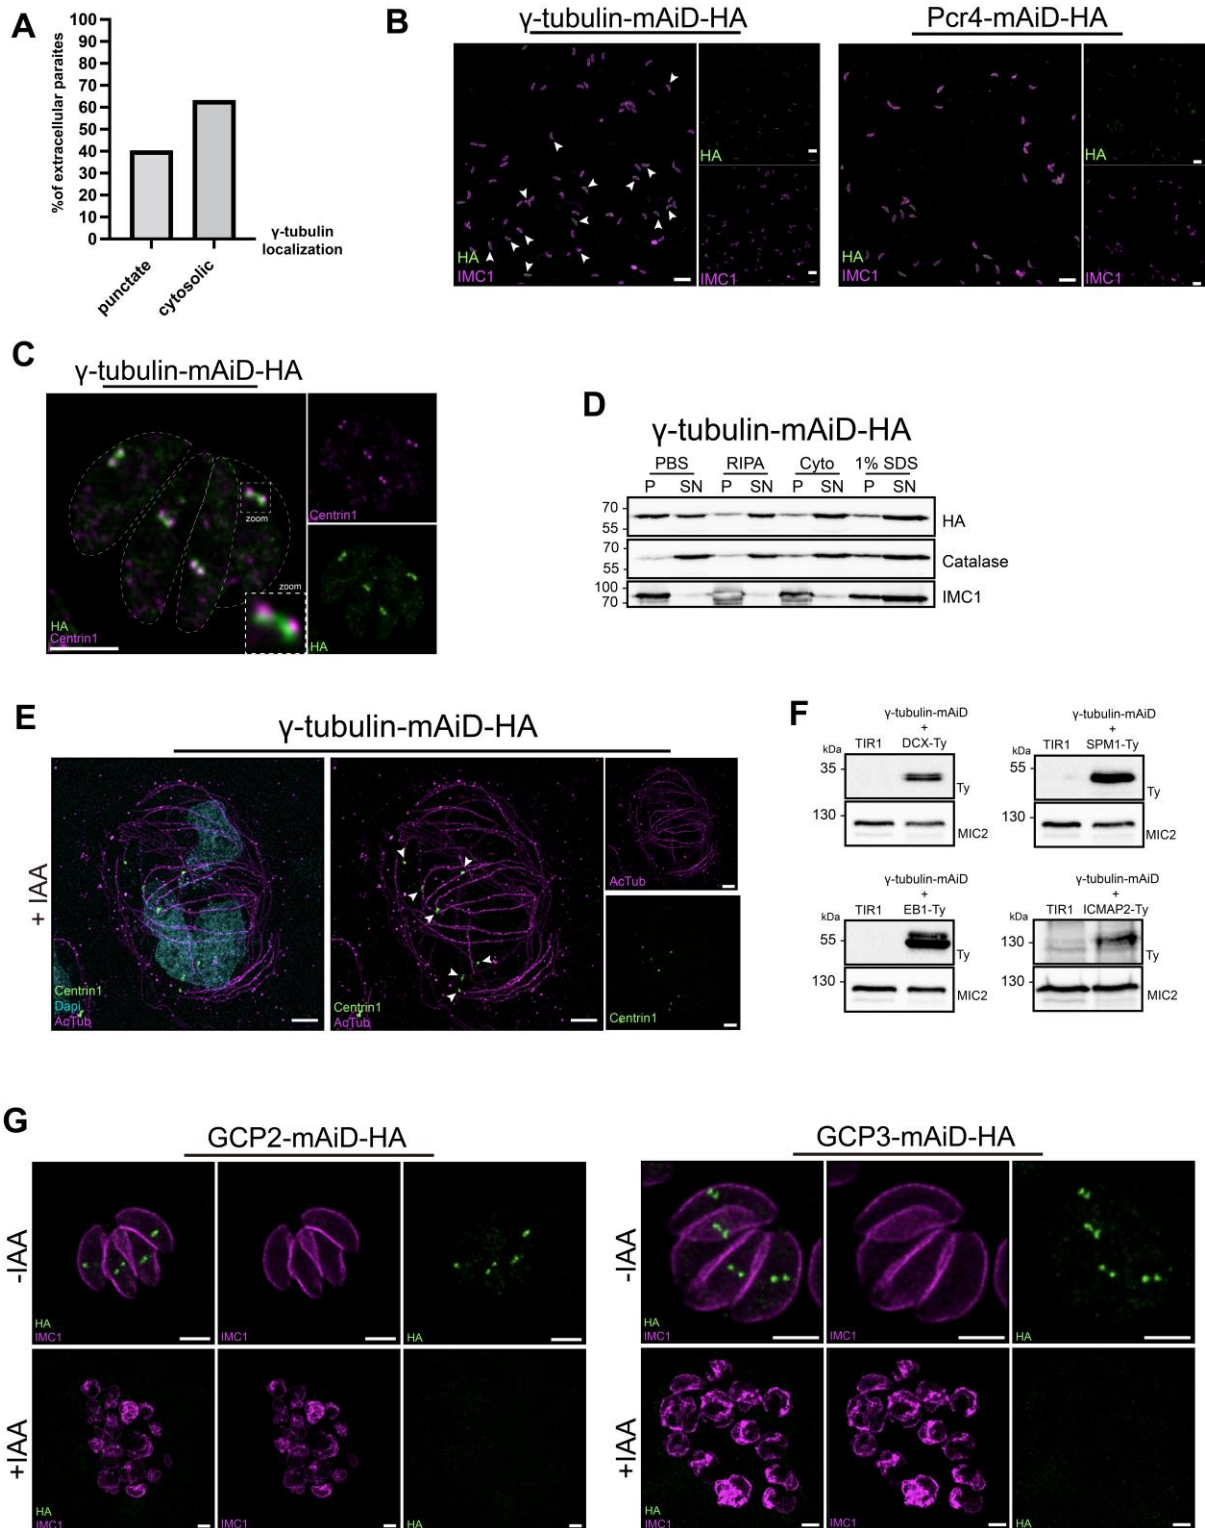

**Supplemental Figure 2**

**(A):** Proportion analysis of the pattern staining of  $\gamma$ -tubulin-mAiD-HA in extracellular *T. gondii* parasites. N = 100 parasites. **(B):** IFA images of extracellular parasites of  $\gamma$ -tubulin-mAiD-HA and Pcr4-mAiD-HA strains. Arrows showing punctate staining for  $\gamma$ -tubulin protein. Scale bar = 10 $\mu$ m. **(C):** IFA images of colocalization of  $\gamma$ -tubulin and centrin1 protein in intracellular dividing parasites. Scale bar = 3 $\mu$ m. **(D):** Western-Blot analysis of the solubility of  $\gamma$ -tubulin on extracellular parasites extract. Catalase = PBS soluble protein control. IMC1 = SDS1% soluble protein control. **(E):** U-ExM of

intracellular dividing parasites depleted of  $\gamma$ -tubulin representing the fragmented centrin1 staining. Parasites were treated with auxin during 12h. Scale bar = 5 $\mu$ m. **(F)**: Western-Blot analysis of the protein expression of the four microtubules associated proteins tagged into the  $\gamma$ -tubulin-mAID-HA background. MIC2 protein used as a loading control. **(G)**: Immuno-fluorescence representing the phenotype and localization of GCP2-mAID-HA and GCP3-mAID-HA in intracellular dividing parasite in absence or presence of auxin (IAA) Scale bar = 3 $\mu$ m. In +IAA panels, parasites were treated with auxin during 12h.

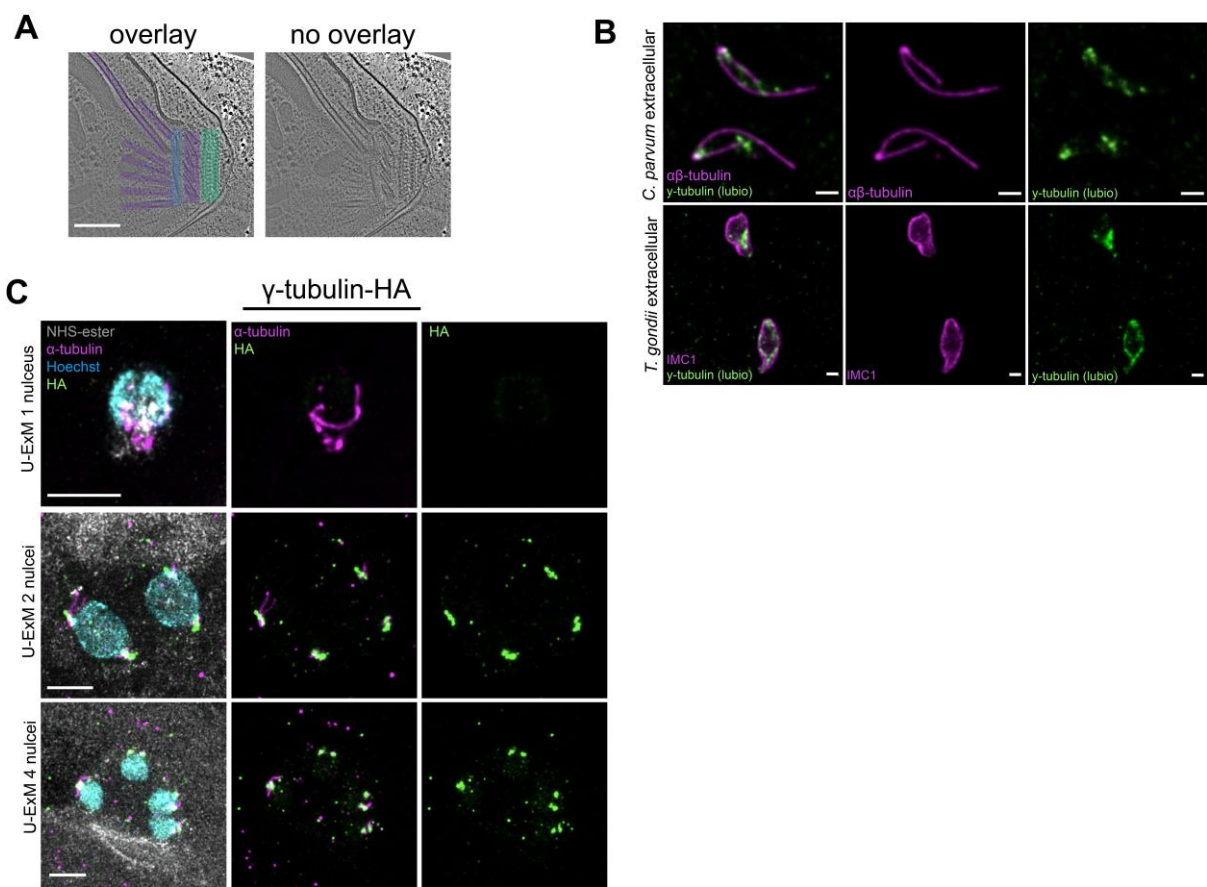

**Supplemental Figure 3**

**(A):** Cryo-electron microscopy tomogram slice of the apical end of *C. parvum* sporozoite with or without overlay annotation. **(B):** IFA images representing the staining of a commercially available anti- $\gamma$ -tubulin antibody in *T. gondii* tachyzoites and *C. parvum* sporozoites Scale bar = 1 $\mu$ m. **(C):** Additional U-ExM images of  $\gamma$ -tubulin-HA localization during *C. parvum* merogony. Scale bar = 5 $\mu$ m.
